# Supplementary material
Source: HighWire-hosted journal article supplement (https://www.genetics.org/content/suppl/2010/06/02/genetics.110.117614)
Supplement: FigureS1.pdf [file FigureS1.pdf]

(A)

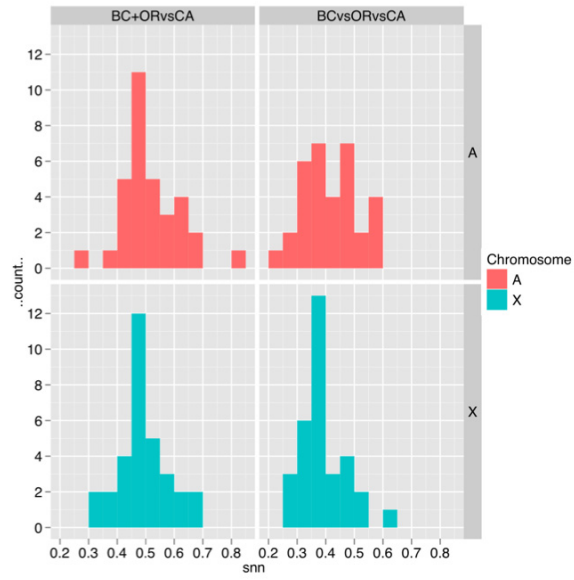

(B)

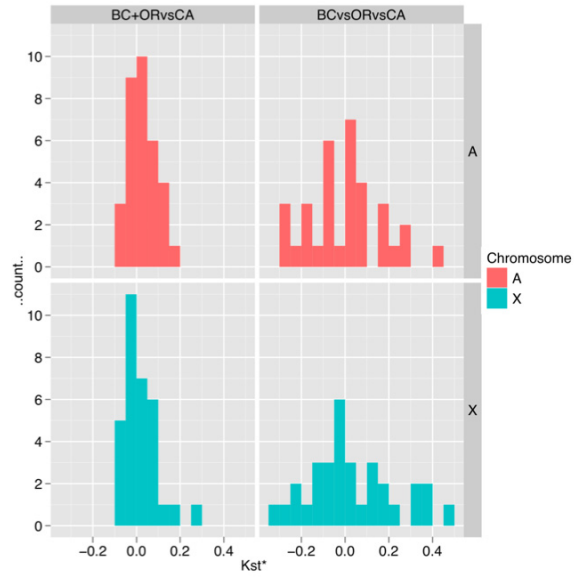

FIGURE S1.—Population subdivision between *D. miranda* lines measured by (A)  $snn$  and (B)  $KST^*$ . The left hand side of each panel shows the results when the BC and OR lines are grouped together and compared to the CA lines, the right hand side shows the results when all three groups are considered separately (see main text for details).
